# Supplementary material
Source: PubMed Central journal article supplement (PMC5772231)
Supplement: AEM.01517-17_zam003188270s1.pdf [file AEM.01517-17_zam003188270s1.pdf]

## 1 **Supplementary figures and tables**

2  
3 Figure S1. Transmission electron microscopy (TEM) images of *Synechococcus* and associated  
4 heterotrophic bacteria in the *Synechococcus* sp. XM-24 culture.

5  
6 Figure S2. The dynamic relationships between *Synechococcus* and heterotrophic bacteria in  
7 *Synechococcus* sp. XM-24 culture. The abundances of *Synechococcus* and heterotrophic bacteria  
8 were measured by flow cytometer. A, the original abundances of *Synechococcus* and heterotrophic  
9 bacteria were  $1.54 \times 10^7$  and  $6.01 \times 10^5$  cells mL<sup>-1</sup>, respectively. B, the original abundances of  
10 *Synechococcus* and heterotrophic bacteria were  $3.69 \times 10^7$  and  $1.77 \times 10^7$  cells mL<sup>-1</sup>, respectively.

11 **The red dots mean the size-fractionated samples were collected for subsequent community**  
12 **composition analyses.**

13  
14 Figure S3. Histogram representation of qPCR analysis of 16S rRNA gene copy-number from the  
15 0.22-3- $\mu$ m and >3- $\mu$ m size fractions of *Synechococcus* culture samples.

16  
17 Figure S4. The relative abundance of *Synechococcus* (OTU0) in the total 16S rRNA sequences  
18 and dominant heterotrophic bacterial groups (OTU1-3) in the total heterotrophic bacterial 16S  
19 rRNA sequences (after removing *Synechococcus* sequences) from the 0.22-3- $\mu$ m (red) and >3- $\mu$ m  
20 (green) size-fractions during the *Synechococcus* sp. XM-24 culture growth with different inocula  
21 (A- and B-). OTU0, *Synechococcus*; OTU1, *Fluviicola*; OTU2, *Roseivirga*; OTU3, *Marivita*.

22  
23 Figure S5. Processes of forming associations between *Synechococcus* and heterotrophic bacteria.  
24 A, natural seawater is spread on a plate; B, *Synechococcus* cells interacting with heterotrophic  
25 bacteria grow and begin to form colonies; C, *Synechococcus* cells release organic matter (such as  
26 exopolysaccharides); D, heterotrophic bacteria attach to *Synechococcus* colonies and grow along  
27 with them, with interactions and exchange of metabolites that allow the different organisms to  
28 continue to grow and survive on the plate.

29  
30 Table S1. Information for isolated *Synechococcus* strains.

31  
32 Table S2. General classification for representative OTUs from 10 *Synechococcus* cultures.

33  
34 Table S3. The distribution patterns of representative OTUs from 10 *Synechococcus* cultures in  
35 coastal water around Xiamen Island.

36  
37 Table S4. Taxonomic affiliations of the dominant OTUs and their abundances in the different size  
38 fractions.

39  
40 Table S5. Environmental variables in the seawaters corresponding to samples from around  
41 Xiamen and Xisha Islands respectively.

42

43

44 Figure S1

45

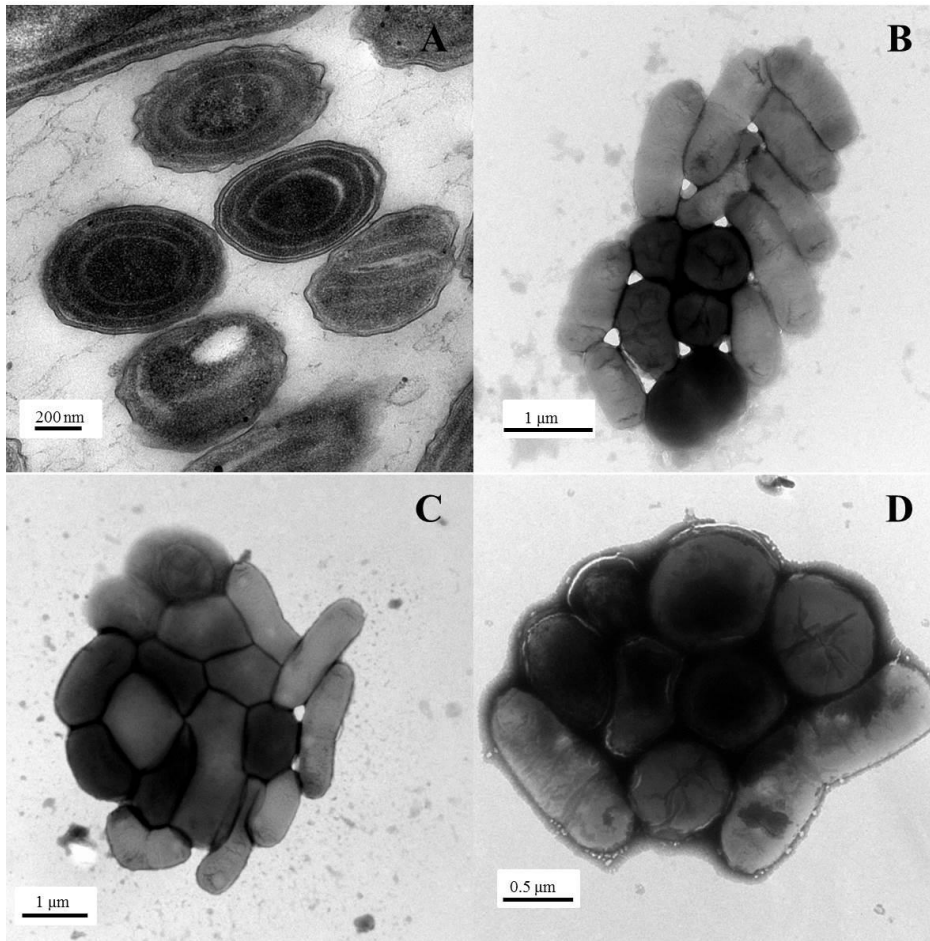

46

47

48

Figure S2

49

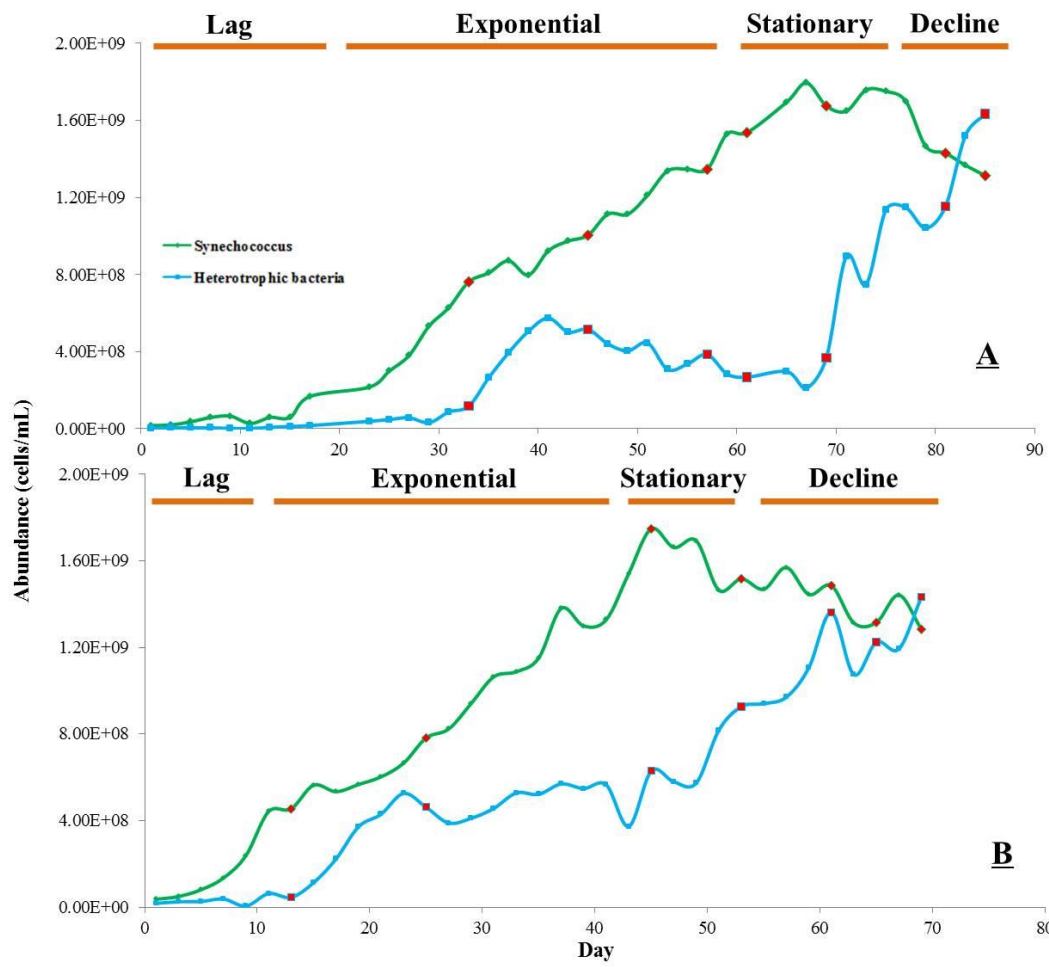

50

51

52

53

54 **Figure S3**

55

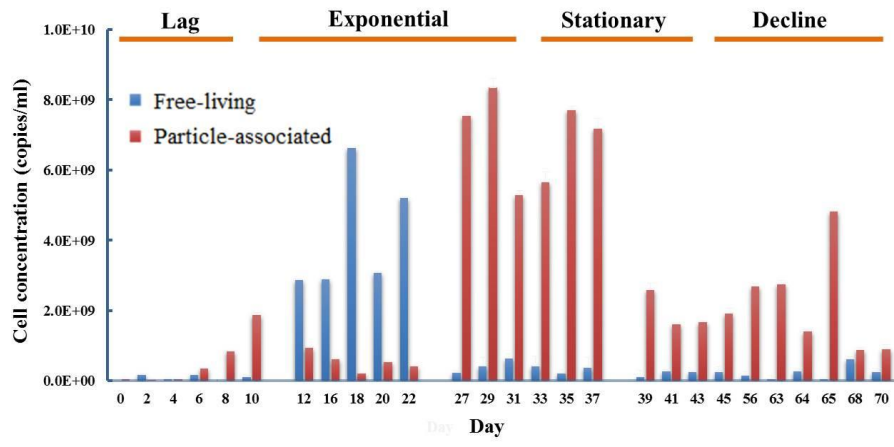

56

57

58

59

60

61

62 Figure S4

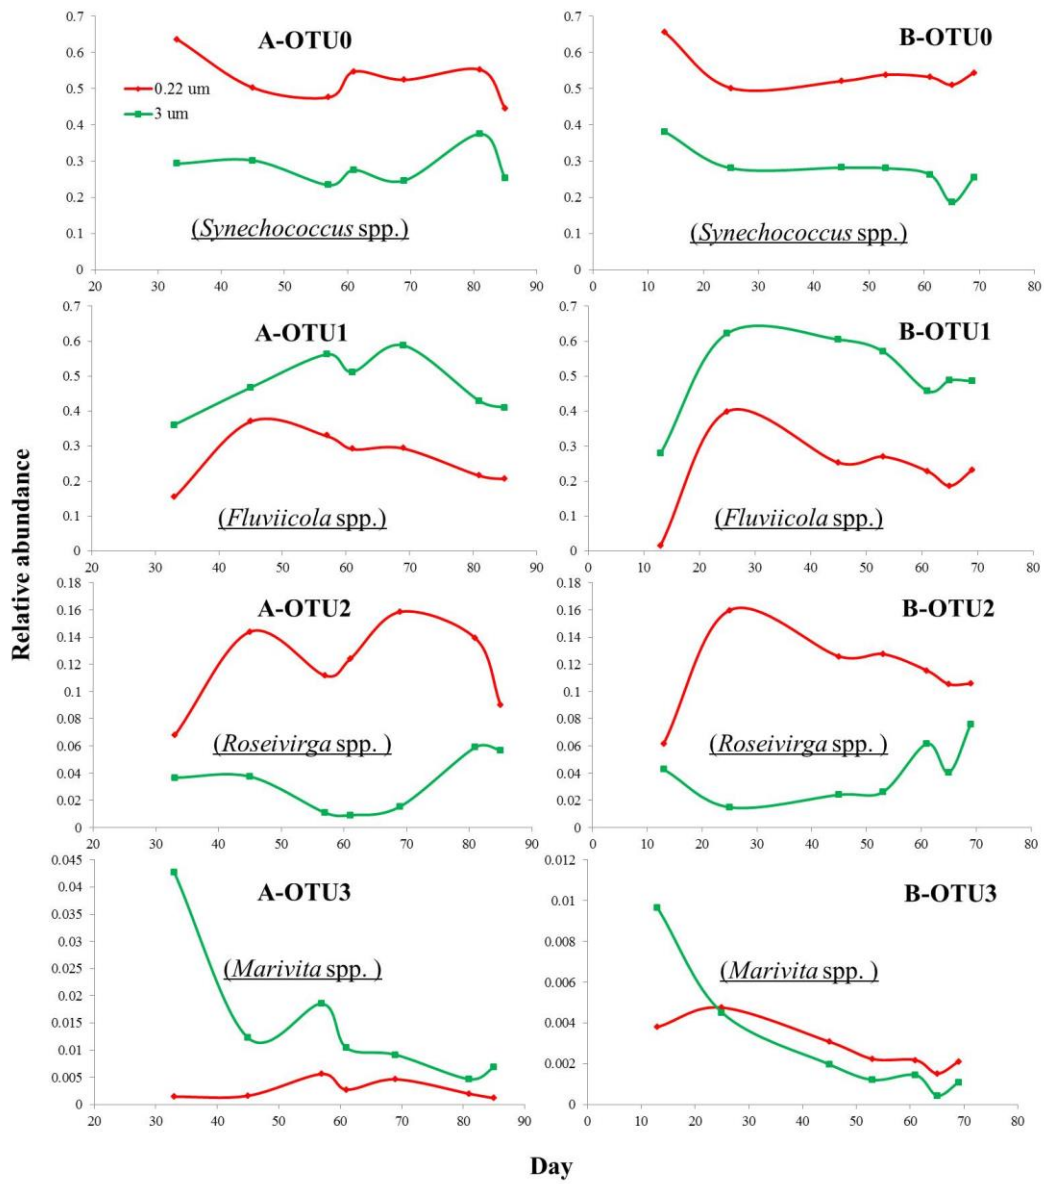

63

64

65

66

67 Figure S5

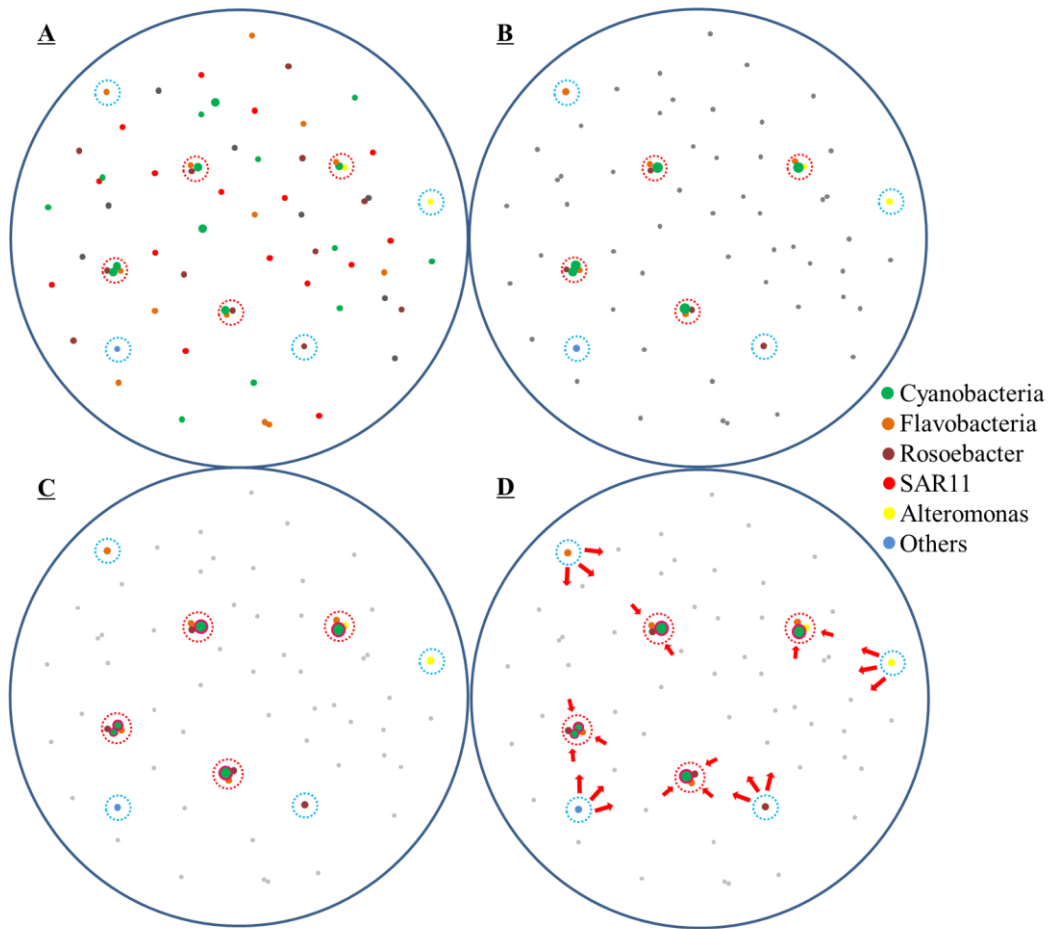

68

69

70

71

72 Table S1. Information for isolated *Synechococcus* strains.

|                      | Strain  | Genotype       | Isolation environment  | Station |
|----------------------|---------|----------------|------------------------|---------|
| Eutrophic strains    | XM-5    | 5.2 Clade CB5  | Xiamen estuary/coastal | S12     |
|                      | XM-11   | 5.2 Clade CB5  | Xiamen estuary/coastal | S07     |
|                      | XM-24   | 5.2 Clade CB5  | Xiamen estuary/coastal | S07     |
|                      | XM-13   | 5.1 Clade IX   | Xiamen estuary/coastal | S07     |
|                      | Cy04    | 5.1 Clade VIII | Dalian coastal         | -       |
| Oligotrophic strains | YX-A3-2 | 5.1 Clade II   | South China Sea        | YX-A3   |
|                      | ZS02-2  | 5.1 Clade II   | South China Sea        | ZS02    |
|                      | YX04-3  | 5.1 Clade III  | South China Sea        | YX04    |
|                      | YX02-3  | 5.1 Clade III  | South China Sea        | YX02    |
|                      | ZS01-1  | 5.1 Clade V    | South China Sea        | ZS01    |

73

Table S2. General classification for representative OTUs from 10 *Synechococcus* cultures.

| OTU ID          | taxonomy                                                                                                                           |
|-----------------|------------------------------------------------------------------------------------------------------------------------------------|
| 1 denovo 12385  | k__Bacteria; p__Bacteroidetes; c__Flavobacteriia; o__Flavobacteriales; f__Cryomorphaceae; g__Fluviicola; s__                       |
| 2 denovo 16098  | k__Bacteria; p__Bacteroidetes; c__Cytophagia; o__Cytophagales; f__Cyclobacteriaceae; g__Algoriphagus; s__ornithinivorans           |
| 3 denovo 17405  | k__Bacteria; p__Bacteroidetes; c__Flavobacteriia; o__Flavobacteriales; f__; g__; s__                                               |
| 4 denovo 3086   | k__Bacteria; p__Bacteroidetes; c__Flavobacteriia; o__Flavobacteriales; f__Flavobacteriaceae; g__; s__Polaribacter sp.MED152        |
| 5 denovo 521    | k__Bacteria; p__Bacteroidetes; c__[Rhodothermi]; o__[Rhodothermales]; f__[Balneolaceae]; g__Balneola; s__                          |
| 6 denovo 4543   | k__Bacteria; p__Bacteroidetes; c__Flavobacteriia; o__Flavobacteriales; f__Flavobacteriaceae; g__; s__                              |
| 7 denovo 4545   | k__Bacteria; p__Bacteroidetes; c__[Saprospirae]; o__[Saprospirales]; f__Saprospiraceae; g__; s__                                   |
| 8 denovo 15190  | k__Bacteria; p__Bacteroidetes; c__Flavobacteriia; o__Flavobacteriales; f__Cryomorphaceae; g__; s__                                 |
| 9 denovo 15071  | k__Bacteria; p__Bacteroidetes; c__Cytophagia; o__Cytophagales; f__Flammeovirgaceae; g__; s__                                       |
| 10 denovo 8101  | k__Bacteria; p__Bacteroidetes; c__[Rhodothermi]; o__[Rhodothermales]; f__[Balneolaceae]; g__Balneola; s__                          |
| 11 denovo 6175  | k__Bacteria; p__Bacteroidetes; c__[Saprospirae]; o__[Saprospirales]; f__Saprospiraceae; g__; s__                                   |
| 12 denovo 18503 | k__Bacteria; p__Bacteroidetes; c__Cytophagia; o__Cytophagales; f__Flammeovirgaceae; g__Roseivirga; s__                             |
| 13 denovo 16987 | k__Bacteria; p__Proteobacteria; c__Alphaproteobacteria; o__Rhodobacterales; f__Rhodobacteraceae; g__Thalassobius; s__gelatinovorus |
| 14 denovo 19760 | k__Bacteria; p__Proteobacteria; c__Alphaproteobacteria; o__Rhodobacterales; f__Rhodobacteraceae; g__Thalassobius; s__mediterraneus |
| 15 denovo 5251  | k__Bacteria; p__Proteobacteria; c__Alphaproteobacteria; o__Rhodobacterales; f__Hyphomonadaceae; g__Maricaulis; s__                 |
| 16 denovo 3482  | k__Bacteria; p__Proteobacteria; c__Alphaproteobacteria; o__Rhodobacterales; f__Rhodobacteraceae; g__Marivita; s__                  |
| 17 denovo 10098 | k__Bacteria; p__Proteobacteria; c__Alphaproteobacteria; o__Rhodobacterales; f__Rhodobacteraceae; g__Roseicyclus; s__mahoneyensis   |
| 18 denovo19086  | k__Bacteria; p__Proteobacteria; c__Alphaproteobacteria; o__Rhodobacterales; f__Rhodobacteraceae; g__; s__                          |
| 19 denovo 4738  | k__Bacteria; p__Proteobacteria; c__Alphaproteobacteria; o__Kiloniellales; f__; g__; s__                                            |
| 20 denovo 8422  | k__Bacteria; p__Proteobacteria; c__Alphaproteobacteria; o__Rhodobacterales; f__Rhodobacteraceae; g__; s__                          |
| 21 denovo 13832 | k__Bacteria; p__Proteobacteria; c__Gammaproteobacteria; o__Alteromonadales; f__Alteromonadaceae; g__Glacielcola; s__               |
| 22 denovo 18145 | k__Bacteria; p__Proteobacteria; c__Gammaproteobacteria; o__Pseudomonadales; f__Pseudomonadaceae; g__; s__                          |
| 23 denovo 10628 | k__Bacteria; p__Actinobacteria; c__Actinobacteria; o__Actinomycetales; f__Microbacteriaceae; g__Candidatus Aquiluna; s__rubra      |



Table S3. The distribution patterns of representative OTUs from 10 *Synechococcus* cultures in coastal waters around Xiamen Island.

| Season       | Winter |       |       |       |       | Spring |       |       |       |       | Summer |       |       |       |       | Autumn |       |       |       |       | Total |      |
|--------------|--------|-------|-------|-------|-------|--------|-------|-------|-------|-------|--------|-------|-------|-------|-------|--------|-------|-------|-------|-------|-------|------|
| #OTU ID      | 1.3    | 1.5   | 1.7   | 1.12  | 1.18  | 4.3    | 4.5   | 4.7   | 4.12  | 4.18  | 7.3    | 7.5   | 7.7   | 7.12  | 7.18  | 10.3   | 10.5  | 10.7  | 10.12 | 10.18 |       |      |
| denovo 12385 | 0.000  | 0.001 | 0.001 | 0.006 | 0.000 | 0.000  | 0.004 | 0.005 | 0.001 | 0.002 | 0.000  | 0.000 | 0.000 | 0.000 | 0.001 | 0.001  | 0.002 | 0.004 | 0.008 | 0.003 | 2322  |      |
| denovo 16098 | 0.000  | 0.000 | 0.000 | 0.000 | 0.000 | 0.000  | 0.000 | 0.000 | 0.000 | 0.000 | 0.000  | 0.000 | 0.000 | 0.000 | 0.000 | 0.000  | 0.000 | 0.000 | 0.000 | 0.000 | 0.000 | 7    |
| denovo 17405 | 0.000  | 0.000 | 0.000 | 0.001 | 0.000 | 0.000  | 0.000 | 0.000 | 0.000 | 0.000 | 0.000  | 0.000 | 0.000 | 0.000 | 0.000 | 0.000  | 0.000 | 0.000 | 0.000 | 0.000 | 0.000 | 85   |
| denovo 3086  | 0.000  | 0.000 | 0.001 | 0.000 | 0.000 | 0.000  | 0.000 | 0.000 | 0.000 | 0.000 | 0.000  | 0.000 | 0.001 | 0.000 | 0.000 | 0.000  | 0.000 | 0.000 | 0.000 | 0.002 | 0.001 | 333  |
| denovo 521   | -      | -     | -     | -     | -     | -      | -     | -     | -     | -     | -      | -     | -     | -     | -     | -      | -     | -     | -     | -     | -     |      |
| denovo 4543  | -      | -     | -     | -     | -     | -      | -     | -     | -     | -     | -      | -     | -     | -     | -     | -      | -     | -     | -     | -     | -     |      |
| denovo 4545  | -      | -     | -     | -     | -     | -      | -     | -     | -     | -     | -      | -     | -     | -     | -     | -      | -     | -     | -     | -     | -     |      |
| denovo 15190 | 0.000  | 0.000 | 0.000 | 0.000 | 0.000 | 0.000  | 0.000 | 0.000 | 0.000 | 0.000 | 0.000  | 0.000 | 0.000 | 0.000 | 0.000 | 0.000  | 0.000 | 0.000 | 0.000 | 0.000 | 0.000 | 42   |
| denovo 15071 | -      | -     | -     | -     | -     | -      | -     | -     | -     | -     | -      | -     | -     | -     | -     | -      | -     | -     | -     | -     | -     |      |
| denovo 8101  | -      | -     | -     | -     | -     | -      | -     | -     | -     | -     | -      | -     | -     | -     | -     | -      | -     | -     | -     | -     | -     |      |
| denovo 6175  | 0.000  | 0.002 | 0.001 | 0.004 | 0.000 | 0.000  | 0.004 | 0.006 | 0.001 | 0.002 | 0.001  | 0.000 | 0.003 | 0.001 | 0.006 | 0.000  | 0.000 | 0.001 | 0.001 | 0.000 | 2036  |      |
| denovo 18503 | 0.000  | 0.000 | 0.000 | 0.000 | 0.000 | 0.000  | 0.000 | 0.000 | 0.000 | 0.000 | 0.000  | 0.000 | 0.000 | 0.000 | 0.000 | 0.000  | 0.000 | 0.000 | 0.000 | 0.000 | 0.000 | 22   |
| denovo 16987 | 0.000  | 0.000 | 0.000 | 0.000 | 0.000 | 0.000  | 0.000 | 0.000 | 0.000 | 0.000 | 0.000  | 0.000 | 0.000 | 0.000 | 0.000 | 0.000  | 0.000 | 0.000 | 0.000 | 0.000 | 0.000 | 17   |
| denovo 19760 | 0.000  | 0.000 | 0.000 | 0.000 | 0.001 | 0.000  | 0.000 | 0.000 | 0.000 | 0.000 | 0.000  | 0.000 | 0.002 | 0.000 | 0.001 | 0.000  | 0.001 | 0.000 | 0.000 | 0.000 | 0.000 | 435  |
| denovo 5251  | 0.000  | 0.000 | 0.000 | 0.000 | 0.000 | 0.000  | 0.000 | 0.000 | 0.000 | 0.000 | 0.000  | 0.000 | 0.000 | 0.000 | 0.000 | 0.000  | 0.000 | 0.000 | 0.000 | 0.000 | 0.000 | 14   |
| denovo 3482  | 0.004  | 0.003 | 0.003 | 0.000 | 0.002 | 0.001  | 0.000 | 0.000 | 0.000 | 0.000 | 0.000  | 0.000 | 0.000 | 0.002 | 0.000 | 0.002  | 0.000 | 0.000 | 0.000 | 0.000 | 0.000 | 1146 |
| denovo 10098 | 0.000  | 0.000 | 0.000 | 0.000 | 0.000 | 0.000  | 0.000 | 0.000 | 0.000 | 0.000 | 0.000  | 0.000 | 0.000 | 0.000 | 0.000 | 0.000  | 0.000 | 0.000 | 0.000 | 0.000 | 0.000 | 20   |
| denovo 19086 | 0.000  | 0.000 | 0.000 | 0.000 | 0.000 | 0.000  | 0.000 | 0.000 | 0.000 | 0.000 | 0.000  | 0.000 | 0.000 | 0.000 | 0.000 | 0.000  | 0.000 | 0.000 | 0.000 | 0.000 | 0.000 | 19   |
| denovo 4738  | 0.000  | 0.003 | 0.001 | 0.021 | 0.000 | 0.002  | 0.002 | 0.002 | 0.000 | 0.001 | 0.000  | 0.000 | 0.000 | 0.000 | 0.000 | 0.002  | 0.001 | 0.009 | 0.013 | 0.002 | 3804  |      |
| denovo 8422  | 0.000  | 0.000 | 0.000 | 0.000 | 0.000 | 0.000  | 0.000 | 0.000 | 0.000 | 0.000 | 0.000  | 0.000 | 0.000 | 0.000 | 0.000 | 0.000  | 0.000 | 0.000 | 0.000 | 0.000 | 0.000 | 5    |
| denovo 13832 | 0.000  | 0.000 | 0.000 | 0.000 | 0.000 | 0.000  | 0.000 | 0.000 | 0.000 | 0.000 | 0.024  | 0.000 | 0.002 | 0.002 | 0.011 | 0.000  | 0.001 | 0.000 | 0.000 | 0.000 | 0.000 | 2459 |
| denovo 18145 | -      | -     | -     | -     | -     | -      | -     | -     | -     | -     | -      | -     | -     | -     | -     | -      | -     | -     | -     | -     | -     |      |
| denovo 10628 | 0.042  | 0.006 | 0.003 | 0.003 | 0.037 | 0.011  | 0.006 | 0.002 | 0.011 | 0.012 | 0.004  | 0.003 | 0.005 | 0.003 | 0.007 | 0.008  | 0.002 | 0.003 | 0.012 | 0.006 | 10528 |      |

---

|                 |        |        |        |        |        |        |        |        |        |        |        |        |        |        |        |        |        |        |        |        |
|-----------------|--------|--------|--------|--------|--------|--------|--------|--------|--------|--------|--------|--------|--------|--------|--------|--------|--------|--------|--------|--------|
| Total Sequences | 62,097 | 80,187 | 67,146 | 89,791 | 55,296 | 64,719 | 63,805 | 60,894 | 54,855 | 59,615 | 63,539 | 45,394 | 49,985 | 49,566 | 65,379 | 71,859 | 51,599 | 47,242 | 53,790 | 52,238 |
|-----------------|--------|--------|--------|--------|--------|--------|--------|--------|--------|--------|--------|--------|--------|--------|--------|--------|--------|--------|--------|--------|

---

\*The relative abundance of each OTU that is more than 0.1% is highlighted.

1.3, 1.5, 1.7. 1.12 and 1.18 mean samples collected in January (winter); 4.3, 4.5, 4.7. 4.12 and 4.18 indicate samples collected in April (spring); 7.3, 7.5, 7.7. 7.12 and 7.18 mean samples collected in July (summer); 10.3, 10.5, 10.7. 10.12 and 10.18 indicate samples collected in October (autumn).

1.3, 4.3, 7.3 and 10.3 mean samples collected from station S03; 1.5, 4.5, 7.5 and 10.5 mean samples collected from station S05; 1.7, 4.7, 7.7 and 10.7 mean samples collected from station S07; 1.12, 4.12, 7.12 and 10.12 mean samples collected from station S12; 1.18, 4.18, 7.18 and 10.18 mean samples collected from station S18.

Total sequences indicate the total number of 16S rRNA gene sequences in each library.

Table S4. Taxonomic affiliations of the dominant OTUs and their abundances in the different size fractions.

| OTU ID                       | Corresponding previous OTUs | Order            | Genus                 | 0.22-3 $\mu\text{m}$ | >3 $\mu\text{m}$ | Total     | Ratio* |
|------------------------------|-----------------------------|------------------|-----------------------|----------------------|------------------|-----------|--------|
| OTU0                         | -                           | Synechococcales  | <i>Synechococcus</i>  | 336,821              | 201,890          | 538,711   | 0.57   |
| OTU1                         | denovo12385                 | Flavobacteriales | <i>Fluviicola</i>     | 20,884               | 190,125          | 211,009   | 4.93   |
| OTU2                         | denovo3482                  | Rhodobacterales  | <i>Marivita</i>       | 49,431               | 66,677           | 116,108   | 0.73   |
| OTU3                         | denovo17405                 | Cytophagales     | <i>Roseivirga</i>     | 55,439               | 14,143           | 69,582    | 0.14   |
| OTU4                         | -                           | Flavobacteriales |                       | 4,105                | 21,413           | 25,518    | 2.82   |
| OTU5                         | -                           | Sphingomonadales |                       | 2,152                | 12,799           | 14,951    | 3.22   |
| OTU6                         | denovo10628                 | Actinomycetales  | <i>Aquiluna</i>       | 9,815                | 1,347            | 11,162    | 0.07   |
| OTU7                         | -                           | Rhizobiales      |                       | 3,264                | 7,092            | 10,356    | 1.18   |
| OTU8                         | -                           | Rhodobacterales  | <i>Pseudoruegeria</i> | 2,889                | 6,722            | 9,611     | 1.26   |
| OTU9                         | denovo19760                 | Rhodobacterales  |                       | 4,720                | 2,058            | 6,778     | 0.24   |
| OTU10                        | denovo13832                 | Alteromonadales  |                       | 2,944                | 3,582            | 6,526     | 0.66   |
| Total sequences              |                             |                  |                       | 530,451              | 553,534          | 1,083,985 | -      |
| Total <i>Synechococcus</i>   |                             |                  |                       | 341,228              | 204,042          | 545,270   | -      |
| Total heterotrophic bacteria |                             |                  |                       | 189,223              | 349,492          | 538,715   | 1.00   |

\* (sequences from the >3- $\mu\text{m}$  fraction out of the total *Synechococcus* or heterotrophic bacteria) to (sequences from the 0.22-3- $\mu\text{m}$  fraction out of the total *Synechococcus* or heterotrophic bacteria)

OTUs 4 and 5 were only abundant in the late of decline phase, and the relative abundance of OTUs 7 and 8 were relatively low and had no obvious changes after lag phase. These four OTUs were not detected with high relative abundance in one time sampling (stationary phase).

Table S5. Environmental variables in the seawaters corresponding to samples from around Xiamen and Xisha Islands respectively.

| Variables                              | Xisha       | Xiamen      |
|----------------------------------------|-------------|-------------|
| Temperature (°C)                       | 27.6-28.8   | 23.1-23.6   |
| Salinity (‰)                           | 33.7 -34.2  | 22.4-27.1   |
| NO <sub>3</sub> <sup>-</sup> (μmol/L)  | <0.1        | 18.3-29.2   |
| PO <sub>4</sub> <sup>3-</sup> (μmol/L) | <0.1        | 0.47-1.33   |
| Bacteria (cells/mL)                    | 2.0-5.0E+05 | 1.4-3.1E+06 |
| <i>Prochlorococcus</i> (cells/mL)      | 0.8-3.3E+05 | -           |
| <i>Synechococcus</i> (cells/mL)        | 0.6-2.0E+04 | 1.3-1.7E+04 |
| Pico-eukaryotes (cells/mL)             | 1.0-4.0E+02 | 5.7-6.4E+03 |
